# Supplementary material
Source: publisher figshare collection journal article supplement (https://frontiersin.figshare.com/ndownloader/files/26031983)
Supplement: Supplementary file [file 26031983]

## Supplementary Material

**Table S1:** The mean and standard deviation of the hunger, satiety, and desire to eat values of the whole group of participants and in the two subgroups. The t-tests for independent groups did not uncover any differences between the two groups.

|               | All the participants<br>(N =63) | Immediate Group<br>(N= 31) | Delayed Group<br>(N =32) | t-value<br>(df=61) | pvalue |
|---------------|---------------------------------|----------------------------|--------------------------|--------------------|--------|
| Hunger        | -2.8 (1.7)                      | -2.3 (1.8)                 | -2.4 (1.7)               | .30                | .75    |
| Satiety       | -2.9 (1.9)                      | -2.6 (1.64)                | -2.7 (1.6)               | .21                | .82    |
| Desire to eat | -3.6 (1.7)                      | -2.9 (1.71)                | -3.1 (1.4)               | .63                | .52    |

**Table S2:** The mean and standard deviation values derived from the questionnaires investigating eating patterns. T-tests for independent groups were adopted to compare immediate and delayed group.

|                     | All the<br>participants<br>(N =63) | Immediate<br>Group<br>(N= 31) | Delayed<br>Group<br>(N =32) | t-value<br>(df=61) | p-value |
|---------------------|------------------------------------|-------------------------------|-----------------------------|--------------------|---------|
| BES                 | 5.2 (4.6)                          | 4.9 (5.2)                     | 5.5 (4.1)                   | -.51               | .61     |
| EAT-26              | 4.2 (7.2)                          | 2.5 (3.2)                     | 5.9 (9.4)                   | -1.9               | .05     |
| Y-FAS               | 1.2 (1.1)                          | 1.1 (1.0)                     | 1.3 (1.1)                   | -.80               | .42     |
| DEBQ -<br>Restrain  | 2.1 (0.8)                          | 1.9 (0.7)                     | 2.2 (0.9)                   | -1.7               | .08     |
| DEBQ -<br>Emotional | 1.8 (0.7)                          | 1.8 (0.7)                     | 1.8 (0.7)                   | .26                | .79     |
| DEBQ -<br>External  | 2.8 (0.7)                          | 2.9 (0.6)                     | 2.7 (0.9)                   | .78                | .43     |

*Note: BES= Binge Eating Scale; EAT-26 = Eating attitude test -26 items, Y-FAS=Yale Food Addiction Scale; DEBQ= Dutch Eating Behaviour Questionnaire*

**Table S3:** The mean and standard deviation values derived from questionnaires investigating personality traits. T-tests for independent groups were adopted to compare immediate and delayed group.

|                            | All the<br>participants<br>(N =63) | Immediate<br>Group<br>(N= 31) | Delayed<br>Group<br>(N =32) | t-value<br>(df=61) | p-value |
|----------------------------|------------------------------------|-------------------------------|-----------------------------|--------------------|---------|
| BIS-11 –<br>Attentional    | 15.4 (2.8)                         | 15.7 (3.1)                    | 15.7 (2.5)                  | -1.1               | .31     |
| BIS-11 –<br>Motor          | 18.6 (3.9)                         | 18.6 (4.8)                    | 18.6 (2.8)                  | -0.1               | .98     |
| BIS-11 –<br>No<br>Planning | 24.2 (3.6)                         | 24.8 (4.0)                    | 23.6 (3.1)                  | 1.2                | .31     |
| BIS-11 –<br>Total          | 58.2 (7.6)                         | 58.7 (9.5)                    | 57.6 (5.3)                  | .57                | .56     |
| BIS –<br>Anxiety           | 24.1 (5.0)                         | 23.0 (5.1)                    | 25.1 (4.8)                  | -1.7               | .09     |
| BAS -<br>Reward            | 19.6 (3.5)                         | 20.1 (3.5)                    | 19.1 (3.5)                  | 1.1                | 2.6     |
| BAS-<br>Drive              | 11.5 (3.0)                         | 11.8 (2.9)                    | 11.2 (3.0)                  | .70                | .48     |
| BAS –<br>Fan               | 10.9 (3.5)                         | 11.1 (3.9)                    | 10.8 (3.2)                  | .31                | .75     |
| BAS –<br>Total             | 45.5 (12.9)                        | 46.6 (14.9)                   | 44.4 (10.6)                 | .68                | .49     |

*Note: BIS-11: Barrat Impulsiveness Scale; BIS: Behavioural Inhibition Scale; BAS Behavioural Activation Scale*
